# Supplementary material for: CLASH – Climate-responsive Land Allocation model with carbon Storage and Harvests
Source: Copernicus journal article supplement (doi:10.5194/gmd-17-3041-2024), 2024-04-17
Supplement: Supplementary file 1 [file gmd-17-3041-2024-supplement.pdf]

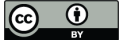

*Supplement of*

## **CLASH – Climate-responsive Land Allocation model with carbon Storage and Harvests**

**Tommi Ekhholm et al.**

*Correspondence to:* Tommi Ekhholm (tommi.ekholm@fmi.fi)

The copyright of individual parts of the supplement might differ from the article licence.

This Supplementary Material provides technical information on the model and additional figures to support the main text. The figures portray annual mean temperature and precipitation for each biome in the EC-Earth3 scenarios, the fits for litter and soil carbon in forests, pastures and croplands, and validations using the parametrizations of CLASHS based on CanESM and MPI models.

## 5 **Model structure and use**

CLASH is written in GAMS. The land-use module files are located in the main directory and the ecological module in its own subdirectory, which further contains separate subdirectories for the three parametrizations of CLASH based on the different ESMS' climate scenarios.

10 The ecological module produces GDX files that contain the parameterization of the land-use module. The input parameters are read from text files produced by the calibration scripts written in R. These text files are provided as a part of CLASH, and running the R scripts would be necessary only if the CLASH would be recalibrated for new ESM scenarios, regional definitions, or functional forms. The ecological module also reads a scenario for temperature change and atmospheric CO<sub>2</sub> concentration. This file can be provided externally, based on the ESM scenarios, or it can be produced by the IAM to which CLASH is embedded.

15 For using the model within an IAM, the CLASH\_Core.gms file needs to be included in the IAM source code. The IAM needs to provide the set *time* (alias *t*), subsets *tfirst* and *tlast*, the objective function and the model and solve statements. To run CLASH as a stand-alone model, as was done in this manuscript, a main file needs to provide these sets, the objective function and the MODEL and SOLVE statements. The CLASH code repository contains CLASH\_Wrapper.gms file, which can be used for this purpose as the main file.

20

## Specifications of climate the scenario experiments used in LPJ-GUESS

**Table S1. Climate scenario experiments used in LPJ-GUESS.**

| Model    | Experiments        | Variant   | Original resolution (gridpoints) | DOI                                                                                                                                                                                                  | Citation                     |
|----------|--------------------|-----------|----------------------------------|------------------------------------------------------------------------------------------------------------------------------------------------------------------------------------------------------|------------------------------|
| EC-Earth | Historical, ssp245 | r1i1p1f1  | 512 x 256 longitude/latitude     | <a href="https://doi.org/10.22033/ESGF/CMIP6.4700">https://doi.org/10.22033/ESGF/CMIP6.4700</a> ,<br><a href="https://doi.org/10.22033/ESGF/CMIP6.4880">https://doi.org/10.22033/ESGF/CMIP6.4880</a> | EC-Earth Consortium, 2019a,b |
| CanESM5  | Historical, ssp245 | r10i1p1f1 | 128 x 64 longitude/latitude      | <a href="https://doi.org/10.22033/ESGF/CMIP6.3610">https://doi.org/10.22033/ESGF/CMIP6.3610</a> ,<br><a href="https://doi.org/10.22033/ESGF/CMIP6.3685">https://doi.org/10.22033/ESGF/CMIP6.3685</a> | Swart et al, 2019a,b         |
| MPI-ESM  | Historical, ssp245 | r1i1p1f1  | 192 x 96 longitude/latitude      | <a href="https://doi.org/10.22033/ESGF/CMIP6.6595">https://doi.org/10.22033/ESGF/CMIP6.6595</a> ,<br><a href="https://doi.org/10.22033/ESGF/CMIP6.6693">https://doi.org/10.22033/ESGF/CMIP6.6693</a> | Wieners et al, 2019a,b       |

25 **EC-Earth: historical r1i1p1f1**

EC-Earth Consortium (EC-Earth) (2019). *EC-Earth-Consortium EC-Earth3 model output prepared for CMIP6 CMIP historical*. Version 20200310. Earth System Grid Federation. <https://doi.org/10.22033/ESGF/CMIP6.4700>

EC-Earth ssp245 r1i1p1f1f r1i1p1f1

- 30 EC-Earth Consortium (EC-Earth) (2019). *EC-Earth-Consortium EC-Earth3 model output prepared for CMIP6 ScenarioMIP ssp245*. Version 20200310. Earth System Grid Federation. <https://doi.org/10.22033/ESGF/CMIP6.4880>  
Original grid TL255, linearly reduced Gaussian grid equivalent to 512 x 256 longitude/latitude

CanESM5 historical r10i1p1f1

- 35 Swart, N.C., Cole, J.N.S., Kharin, V.V., Lazare, M., Scinocca, J.F., Gillett, N.P., Anstey, J., Arora, V., Christian, J.R., Jiao, Y., Lee, W.G., Majaess, F., Saenko, O.A., Seiler, C., Seinen, C., Shao, A., Solheim, L., von Salzen, K., Yang, D., Winter, B., Sigmond, M. (2019). *CCCma CanESM5 model output prepared for CMIP6 CMIP historical*. Version 20190429. Earth System Grid Federation. <https://doi.org/10.22033/ESGF/CMIP6.3610>

40 **CanESM5 ssp245 r10i1p1f1**

Swart, N.C., Cole, J.N.S., Kharin, V.V., Lazare, M., Scinocca, J.F., Gillett, N.P., Anstey, J., Arora, V., Christian, J.R., Jiao, Y., Lee, W.G., Majaess, F., Saenko, O.A., Seiler, C., Seinen, C., Shao, A., Solheim, L., von Salzen, K., Yang, D., Winter, B.,

Sigmond, M. (2019). *CCCma CanESM5 model output prepared for CMIP6 ScenarioMIP ssp245*. Version 20190429. Earth System Grid Federation. <https://doi.org/10.22033/ESGF/CMIP6.3685>

45 Original grid: T63 Linear Gaussian Grid; 128 x 64 longitude/latitude

#### MPI-ESM historical **r1i1p1f1**

Wieners, Karl-Hermann; Giorgetta, Marco; Jungclaus, Johann; Reick, Christian; Esch, Monika; Bittner, Matthias; Legutke, Stephanie; Schupfner, Martin; Wachsmann, Fabian; Gayler, Veronika; Haak, Helmuth; de Vrese, Philipp; Raddatz, Thomas; Mauritsen, Thorsten; von Storch, Jin-Song; Behrens, Jörg; Brovkin, Victor; Claussen, Martin; Crueger, Traute; Fast, Irina; Fiedler, Stephanie; Hagemann, Stefan; Hohenegger, Cathy; Jahns, Thomas; Kloster, Silvia; Kinne, Stefan; Lasslop, Gitta; Kornblueh, Luis; Marotzke, Jochem; Matei, Daniela; Meraner, Katharina; Mikolajewicz, Uwe; Modali, Kameswarrao; Müller, Wolfgang; Nabel, Julia; Notz, Dirk; Peters-von Gehlen, Karsten; Pincus, Robert; Pohlmann, Holger; Pongratz, Julia; Rast, Sebastian; Schmidt, Hauke; Schnur, Reiner; Schulzweida, Uwe; Six, Katharina; Stevens, Bjorn; Voigt, Aiko; Roeckner, Erich

55 (2019). *MPI-M MPI-ESM1.2-LR model output prepared for CMIP6 CMIP historical*. Version 20190710. Earth System Grid Federation. <https://doi.org/10.22033/ESGF/CMIP6.6595>

#### MPI-ESM **ssp245 r1i1p1f1**

Wieners, Karl-Hermann; Giorgetta, Marco; Jungclaus, Johann; Reick, Christian; Esch, Monika; Bittner, Matthias; Gayler, Veronika; Haak, Helmuth; de Vrese, Philipp; Raddatz, Thomas; Mauritsen, Thorsten; von Storch, Jin-Song; Behrens, Jörg; Brovkin, Victor; Claussen, Martin; Crueger, Traute; Fast, Irina; Fiedler, Stephanie; Hagemann, Stefan; Hohenegger, Cathy; Jahns, Thomas; Kloster, Silvia; Kinne, Stefan; Lasslop, Gitta; Kornblueh, Luis; Marotzke, Jochem; Matei, Daniela; Meraner, Katharina; Mikolajewicz, Uwe; Modali, Kameswarrao; Müller, Wolfgang; Nabel, Julia; Notz, Dirk; Peters-von Gehlen, Karsten; Pincus, Robert; Pohlmann, Holger; Pongratz, Julia; Rast, Sebastian; Schmidt, Hauke; Schnur, Reiner; Schulzweida, Uwe; Six, Katharina; Stevens, Bjorn; Voigt, Aiko; Roeckner, Erich

65 Uwe; Six, Katharina; Stevens, Bjorn; Voigt, Aiko; Roeckner, Erich (2019). *MPI-M MPI-ESM1.2-LR model output prepared for CMIP6 ScenarioMIP ssp245*. Version 20190710. Earth System Grid Federation. <https://doi.org/10.22033/ESGF/CMIP6.6693>

Original resolution spectral T63; 192 x 96 longitude/latitude

# Global mean temperature and precipitation

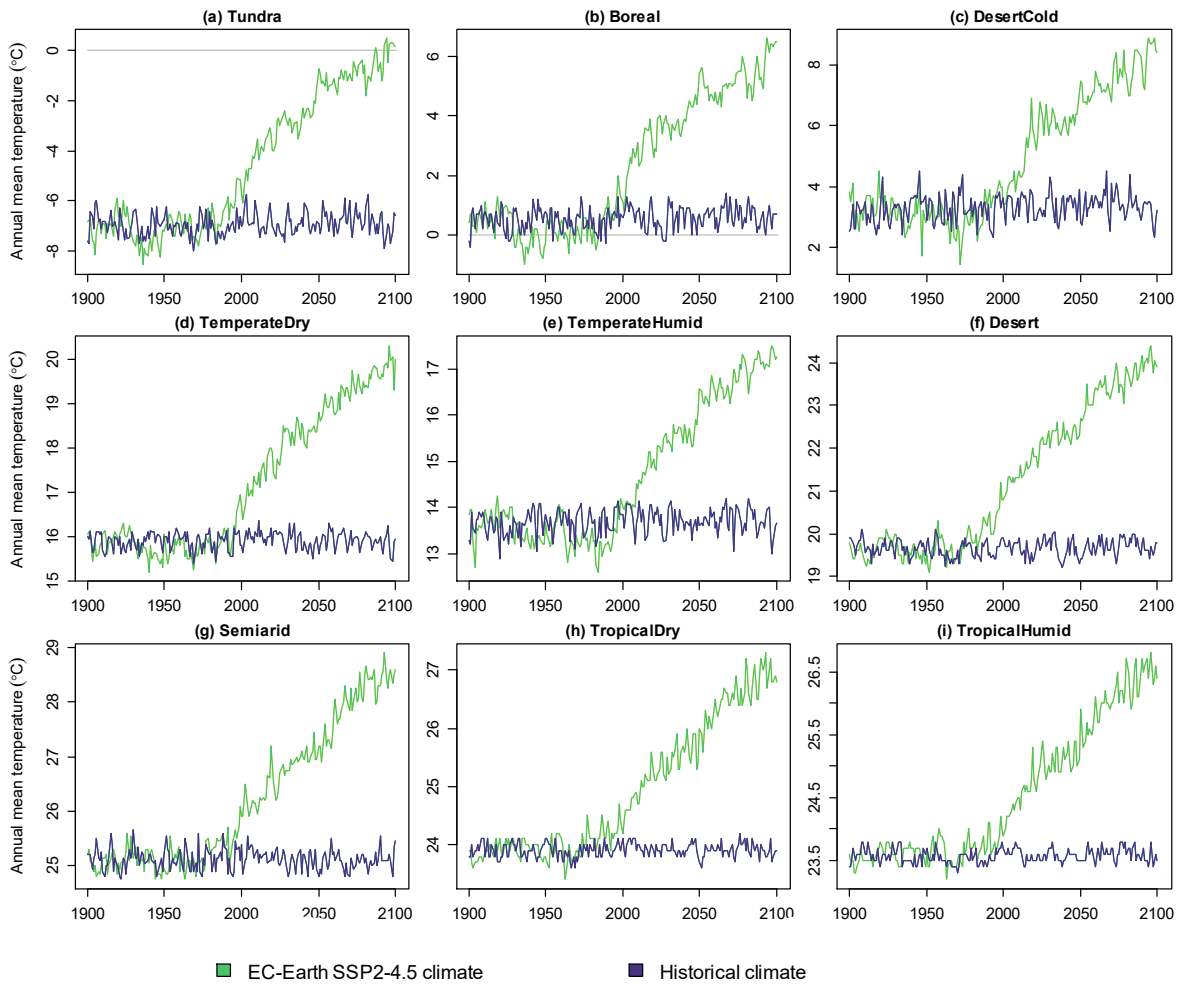

70

Figure S1. Mean temperature in the nine main biomes with historical climate and EC-Earth SSP2-4.5 scenario.

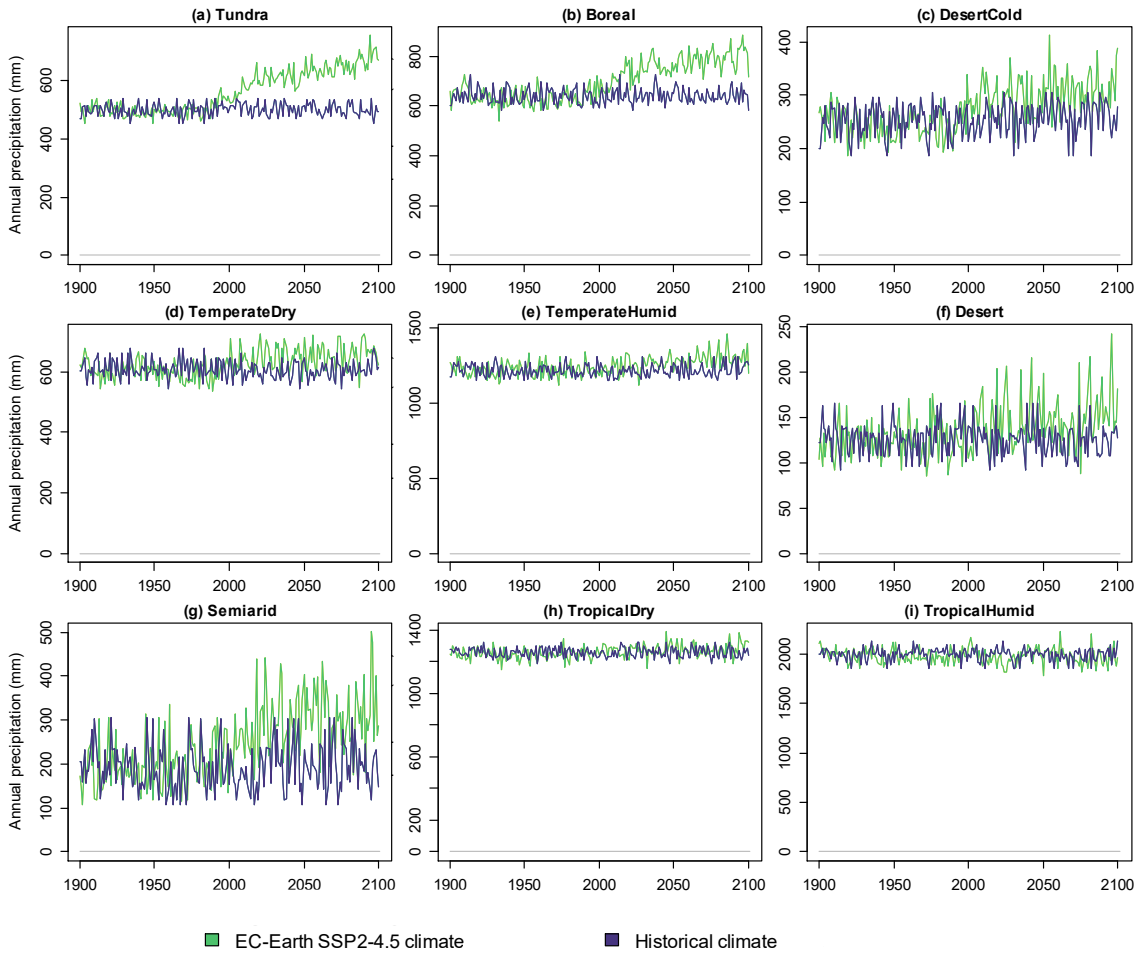

**Figure S2. Annual precipitation in the nine main biomes with historical climate and EC-Earth SSP2-4.5 scenario.**

The following figures portray the litter and soil carbon stocks simulated with LPJ-Guess, and the simulations with fitted functions to the results. These results are discussed in section **Error! Reference source not found.**

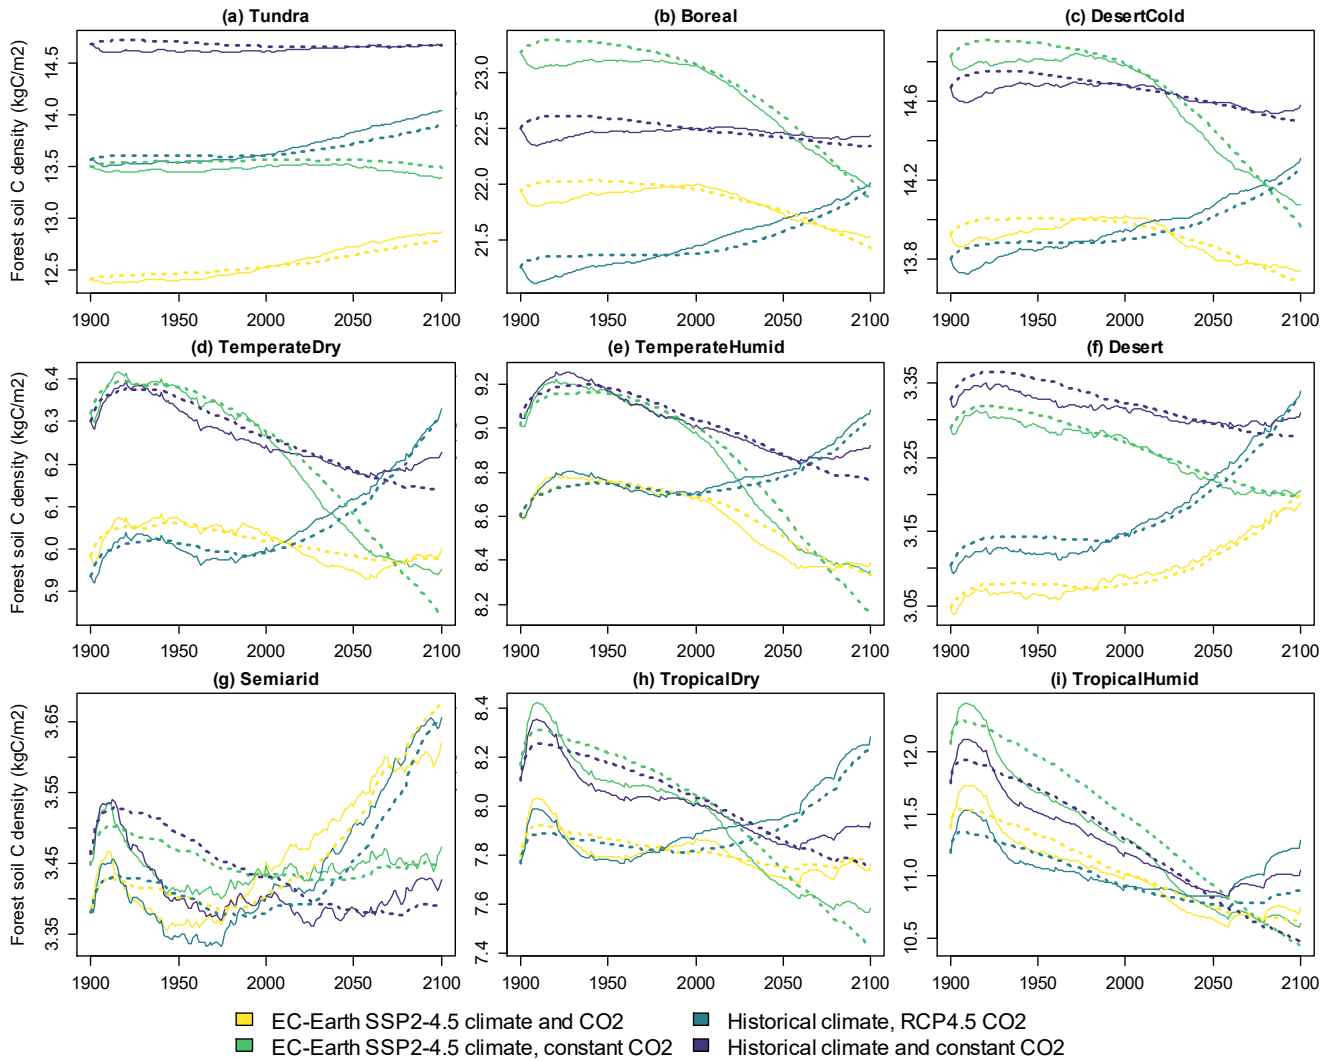

80 **Figure S3 Carbon density in forest soil in the four simulated scenarios. Solid lines indicate LPJ-GUESS simulations and dashed lines indicate functions fitted to the results.**

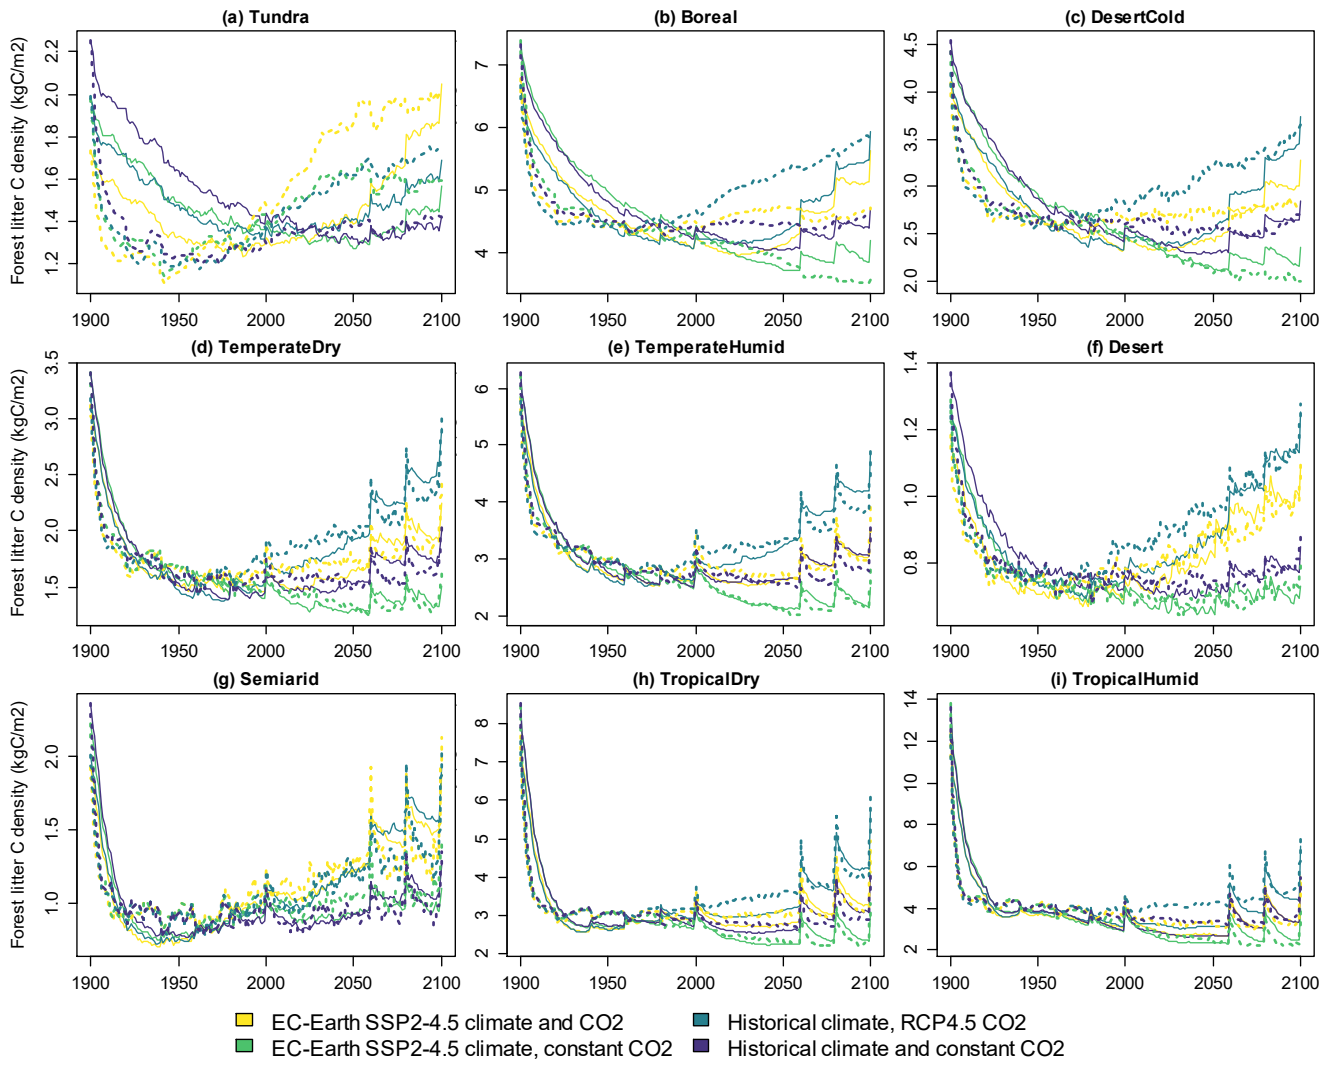

**Figure S4 Carbon density in forest litter in the four simulated scenarios. Solid lines indicate LPJ-GUESS simulations and dashed lines indicate functions fitted to the results.**



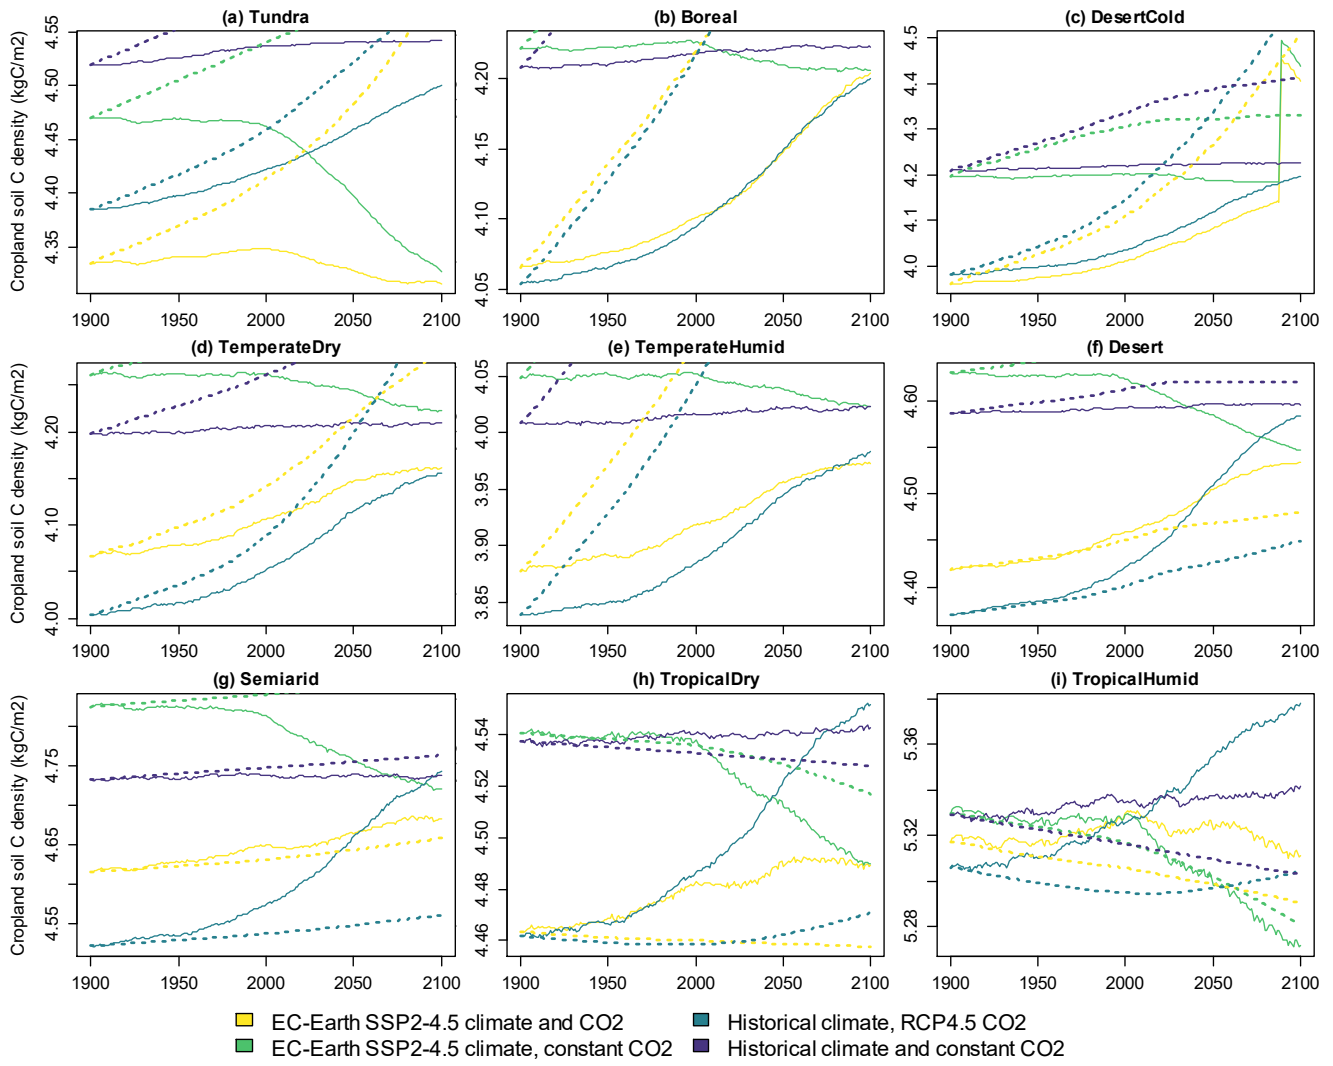

**Figure S5 Carbon density in cropland soil in the four simulated scenarios. Solid lines indicate LPJ-GUESS simulations and dashed lines indicate functions fitted to the results.**

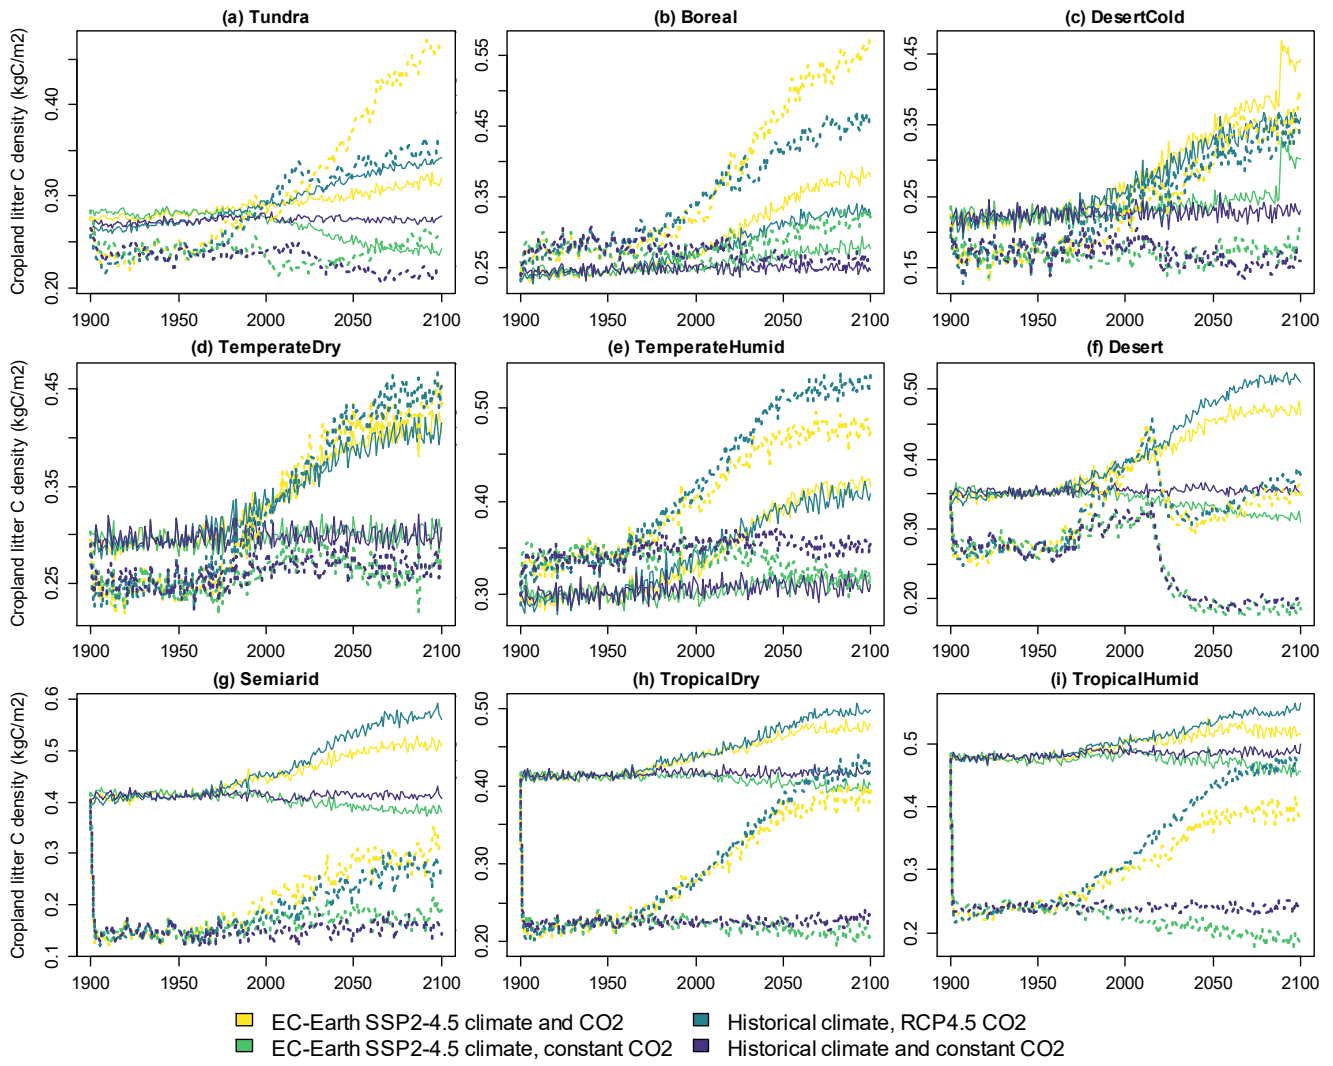

90

**Figure S6 Carbon density in cropland litter in the four simulated scenarios. Solid lines indicate LPJ-GUESS simulations and dashed lines indicate functions fitted to the results.**

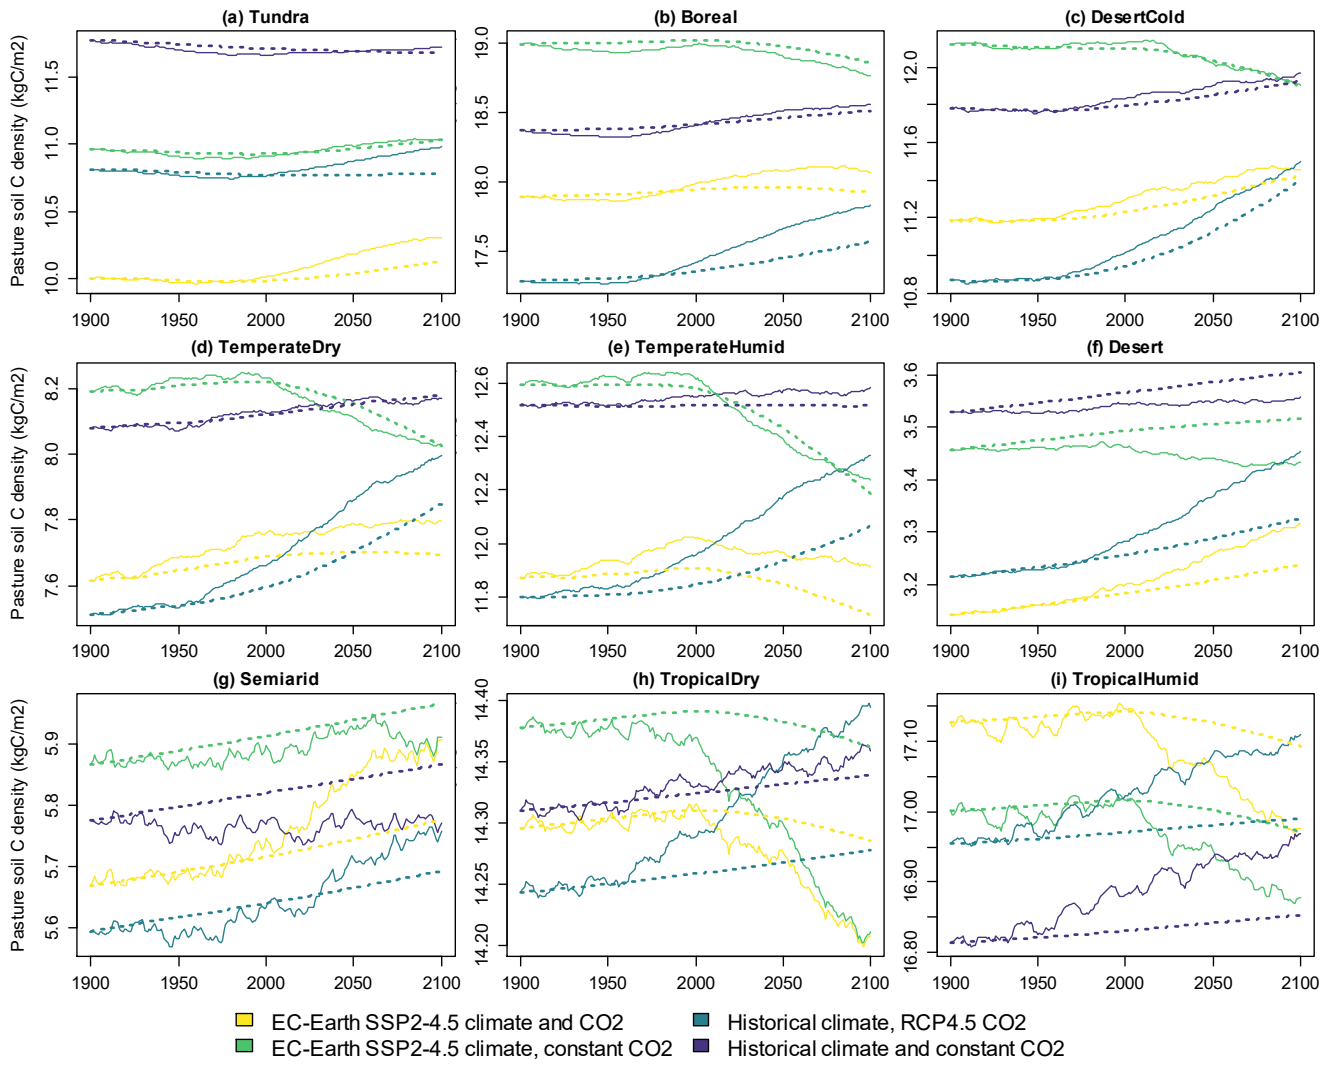

95 **Figure S7 Carbon density in pasture soil in the four simulated scenarios. Solid lines indicate LPJ-GUESS simulations and dashed lines indicate functions fitted to the results.**

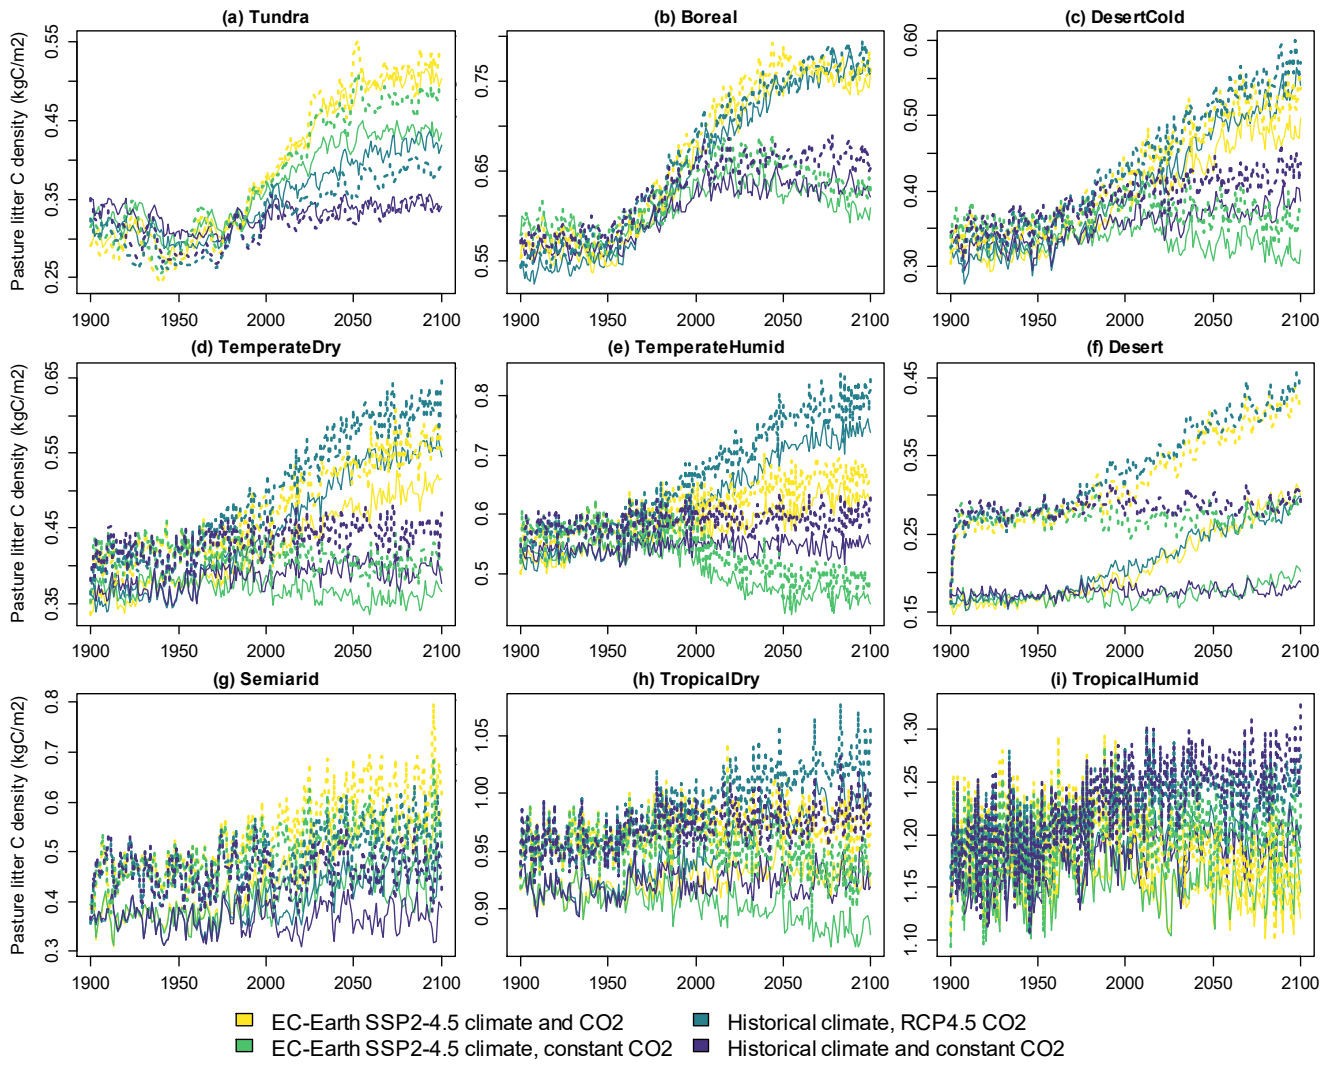

100 **Figure S8 Carbon density in pasture litter in the four simulated scenarios. Solid lines indicate LPJ-GUESS simulations and dashed lines indicate functions fitted to the results.**

## Validation of CanESM and MPI parametrizations

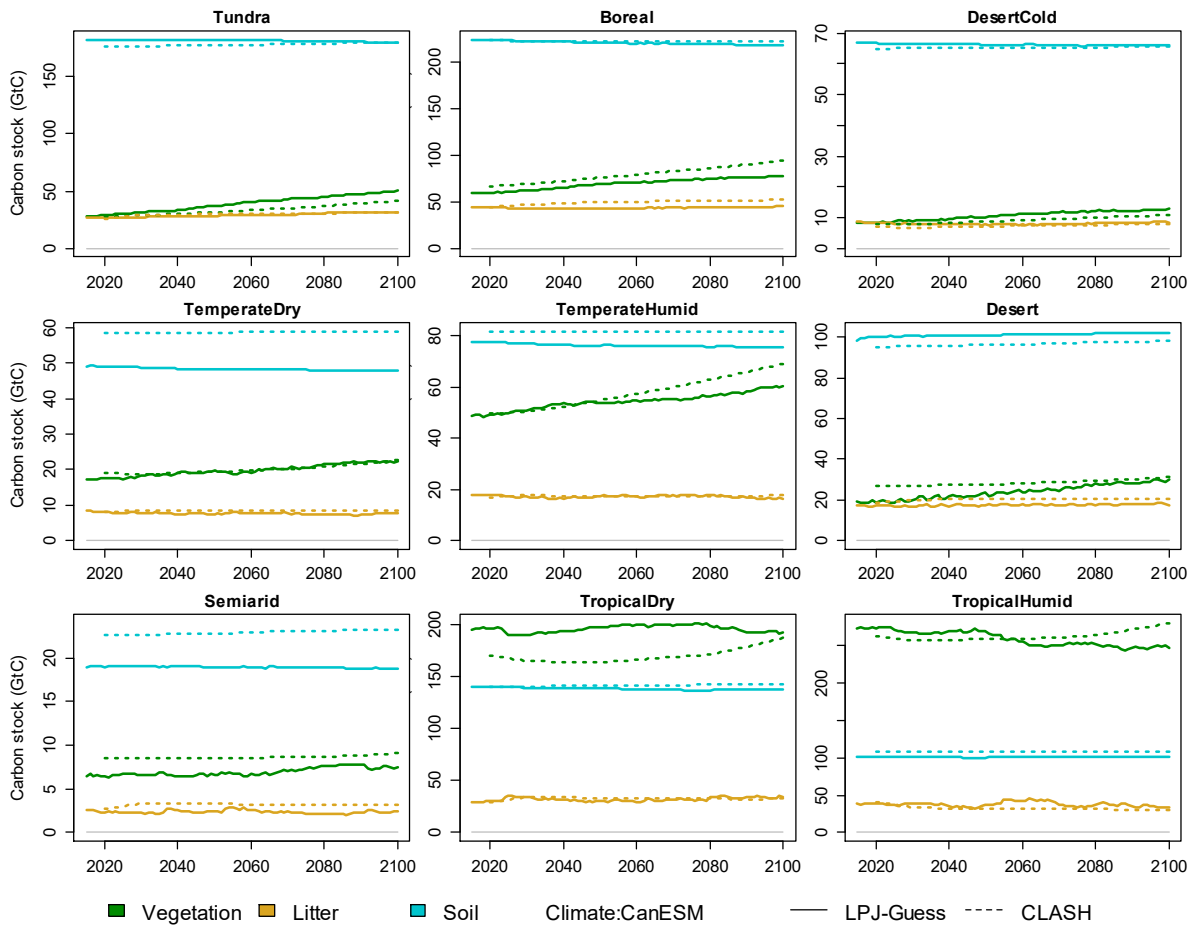

105 Figure S9 Validation of CLASH carbon stocks against LPJ-GUESS in the SSP2-4.5 scenario calculated with the CanESM model; separately for vegetation, litter and soil carbon in each biome. Solid lines indicate LPJ-GUESS results, dashes CLASH results.

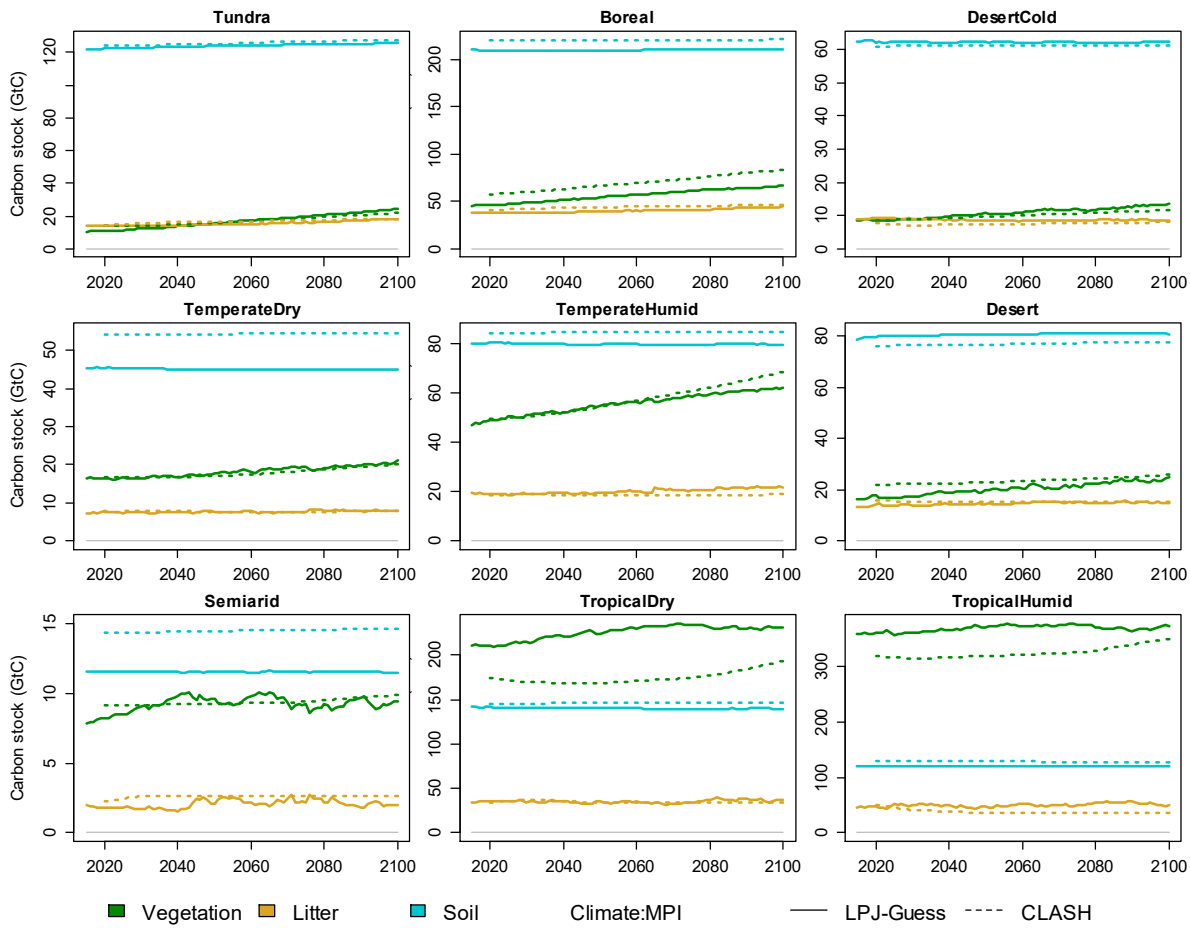

110 **Figure S10 Validation of CLASH carbon stocks against LPJ-GUESS in the SSP2-4.5 scenario calculated with the MPI ESM model; separately for vegetation, litter and soil carbon in each biome. Solid lines indicate LPJ-GUESS results, dashes CLASH results.**
